# Supplementary material
Source: HighWire-hosted journal article supplement (https://www.g3journal.org/content/suppl/2012/01/06/2.1.131)
Supplement: TableS1.pdf [file TableS1.pdf]

**Table S1 Plasmids used in this study**

| Plasmid name        | Relevant genotype                      | Source or reference           |
|---------------------|----------------------------------------|-------------------------------|
| YEpLac181           | 2 $\mu$ <i>LEU2</i>                    | (Gietz and Sugino 1988)       |
| YEpLac195           | 2 $\mu$ <i>URA3</i>                    | (Gietz and Sugino 1988)       |
| YEpLac181-MSS11     | 2 $\mu$ <i>LEU2 MSS11</i>              | (Gagiano <i>et al.</i> 1999a) |
| YEpLac181-PGKp-MUC1 | 2 $\mu$ <i>LEU2 PGK1promoter FLO11</i> | this lab                      |
| YEpLac195-MSS11     | 2 $\mu$ <i>URA3 MSS11</i>              | (Gagiano <i>et al.</i> 1999b) |
